# Supplementary material
Source: PubMed Central journal article supplement (PMC5198277)
Supplement: ASN.2015111271SupplementaryData.pdf [file ASN.2015111271SupplementaryData.pdf]

- 1 **Supplementary Figure 1.** Immunohistochemical distribution of urothelial cells, renal tubular cells, and interstitial cells stained
- 2 by uroplakin III, kidney specific protein, and vimentin, respectively. Magnification,  $\times 100$  (inset  $\times 400$ ). Representative
- 3 micrographs were obtained from normal papillary tissues of CaOx stone formers.

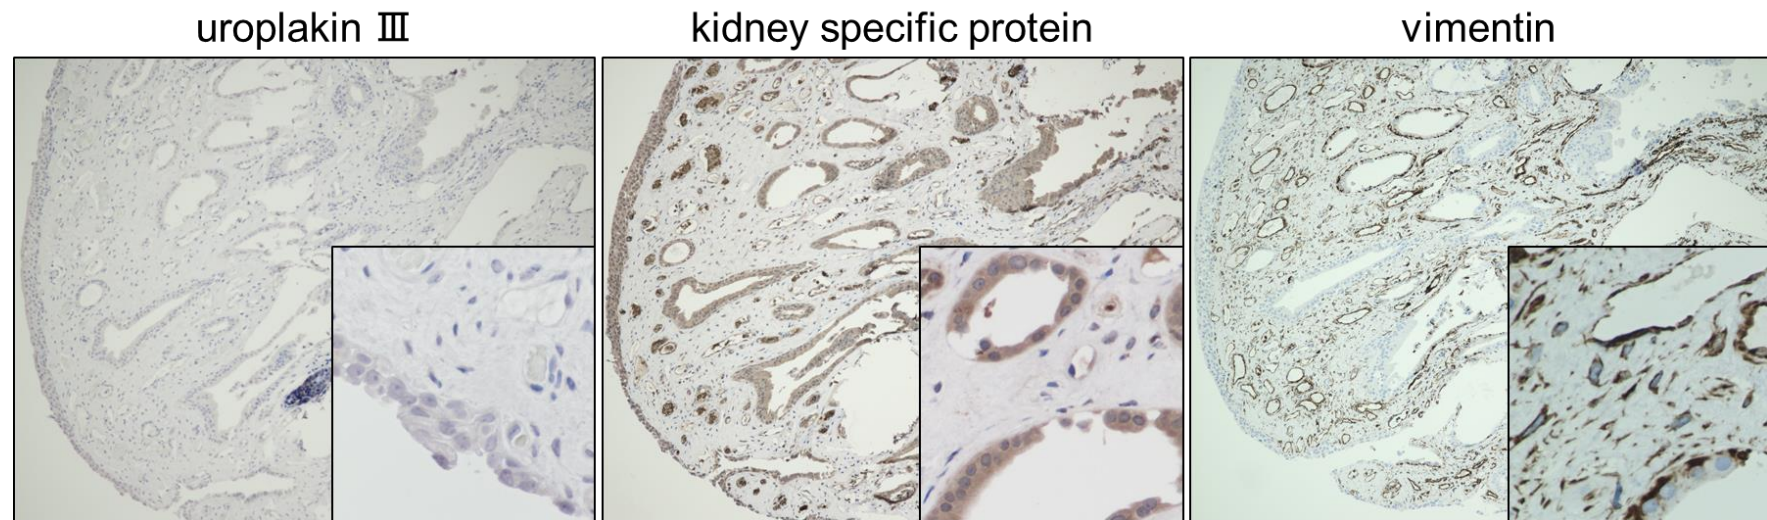

**Supplementary Table 1.** Top 100 upregulated genes in papillary tissue of both Randall's Plaque and normal mucosa with calcium oxalate stone formers compared to those with control patients.

| Agilent ID    | Gene Symbol | Description                                                                                                               | Fold change |
|---------------|-------------|---------------------------------------------------------------------------------------------------------------------------|-------------|
| A_23_P128868  | OR11H12     | Homo sapiens olfactory receptor, family 11, subfamily H, member 12 (OR11H12), mRNA [NM_001013354]                         | 26.613      |
| A_23_P130815  | KIR2DS2     | Homo sapiens killer cell immunoglobulin-like receptor, two domains, short cytoplasmic tail, 2 (KIR2DS2), mRNA [NM_012312] | 26.224      |
| A_24_P402855  | PROL1       | Homo sapiens proline rich, lacrimal 1 (PROL1), mRNA [NM_021225]                                                           | 23.733      |
| A_24_P917306  | ZNF385D     | zinc finger protein 385D [Source:HGNC Symbol;Acc:26191] [ENST00000494108]                                                 | 23.050      |
| A_33_P3260667 | OR2T34      | Homo sapiens olfactory receptor, family 2, subfamily T, member 34 (OR2T34), mRNA [NM_001001821]                           | 20.948      |
| A_33_P3259440 | GOLGA6A     | Homo sapiens golgin A6 family, member A (GOLGA6A), mRNA [NM_001038640]                                                    | 20.628      |
| A_33_P3417281 | MUC4        | Homo sapiens mucin 4, cell surface associated (MUC4), transcript variant 1, mRNA [NM_018406]                              | 20.610      |
| A_24_P239176  | MUC4        | Homo sapiens mucin 4, cell surface associated (MUC4), transcript variant 1, mRNA [NM_018406]                              | 19.965      |
| A_21_P0006968 | SFTA1P      | Homo sapiens surfactant associated 1, pseudogene (SFTA1P), non-coding RNA [NR_027082]                                     | 19.344      |
| A_23_P144512  | GK2         | Homo sapiens glycerol kinase 2 (GK2), mRNA [NM_033214]                                                                    | 19.311      |
| A_33_P3370001 | OR2L8       | Homo sapiens olfactory receptor, family 2, subfamily L, member 8 (OR2L8), mRNA [NM_001001963]                             | 18.255      |
| A_24_P239177  | MUC4        | Homo sapiens mucin 4, cell surface associated (MUC4), transcript variant 1, mRNA [NM_018406]                              | 17.474      |
| A_23_P145159  | DNAH8       | Homo sapiens dynein, axonemal, heavy chain 8 (DNAH8), mRNA [NM_001206927]                                                 | 16.324      |
| A_33_P3369975 | OR2L3       | Homo sapiens olfactory receptor, family 2, subfamily L, member 3 (OR2L3), mRNA [NM_001004687]                             | 15.979      |
| A_33_P3216008 | SKA3        | Homo sapiens spindle and kinetochore associated complex subunit 3 (SKA3), transcript variant 1, mRNA [NM_145061]          | 15.735      |
| A_33_P3372217 | PSG5        | pregnancy specific beta-1-glycoprotein 5 [Source:HGNC Symbol;Acc:9522] [ENST00000401992]                                  | 15.619      |
| A_33_P3411682 | TRIM49C     | tripartite motif containing 49C [Source:HGNC Symbol;Acc:38877] [ENST00000432771]                                          | 15.554      |
| A_33_P3271276 | PSG5        | Homo sapiens pregnancy specific beta-1-glycoprotein 5 (PSG5), transcript variant 2, mRNA [NM_001130014]                   | 14.939      |
| A_21_P0013761 | SSX4B       | Homo sapiens synovial sarcoma, X breakpoint 4B (SSX4B), transcript variant 1, mRNA [NM_001034832]                         | 14.693      |
| A_23_P45579   | HSFY2       | Homo sapiens heat shock transcription factor, Y linked 2 (HSFY2), transcript variant 1, mRNA [NM_153716]                  | 14.631      |
| A_24_P626932  | MUC3        | Homo sapiens SIB 276 intestinal mucin (MUC3) mRNA, partial cds. [AF007191]                                                | 14.574      |
| A_23_P11397   | TTY13       | Homo sapiens testis-specific transcript, Y-linked 13 (non-protein coding) (TTY13), long non-coding RNA [NR_001537]        | 14.513      |
| A_23_P66180   | CACNG3      | Homo sapiens calcium channel, voltage-dependent, gamma subunit 3 (CACNG3), mRNA [NM_006539]                               | 14.484      |
| A_33_P3405680 | ARHGEF3-AS1 | Homo sapiens ARHGEF3 antisense RNA 1 (ARHGEF3-AS1), long non-coding RNA [NR_046572]                                       | 14.480      |
| A_33_P3384133 | C17orf99    | Homo sapiens chromosome 17 open reading frame 99 (C17orf99), mRNA [NM_001163075]                                          | 14.017      |
| A_24_P167377  | OR10P1      | Homo sapiens olfactory receptor, family 10, subfamily P, member 1 (OR10P1), mRNA [NM_206899]                              | 13.627      |
| A_33_P3212764 | FLJ40039    | Homo sapiens cDNA FLJ40039 fis, clone SYNOV2000397. [AK097358]                                                            | 13.562      |

|               |          |                                                                                                                                        |        |
|---------------|----------|----------------------------------------------------------------------------------------------------------------------------------------|--------|
| A_33_P3346448 | PCDH11X  | Homo sapiens protocadherin 11 X-linked (PCDH11X), transcript variant c, mRNA [NM_032968]                                               | 13.213 |
| A_21_P0014000 | KIR3DL2  | Homo sapiens killer cell immunoglobulin-like receptor, three domains, long cytoplasmic tail, 2, transcript variant 1, mRNA [NM_006737] | 13.198 |
| A_24_P375322  | GGT8P    | Homo sapiens gamma-glutamyltransferase 8 pseudogene (GGT8P), non-coding RNA [NR_003503]                                                | 13.154 |
| A_33_P3424122 | TCHHL1   | Homo sapiens trichohyalin-like 1 (TCHHL1), mRNA [NM_001008536]                                                                         | 13.146 |
| A_33_P3381777 | TREML1   | Homo sapiens triggering receptor expressed on myeloid cells-like 1 (TREML1), transcript variant 1, mRNA [NM_178174]                    | 13.097 |
| A_33_P3292886 | KRT6A    | Homo sapiens keratin 6A (KRT6A), mRNA [NM_005554]                                                                                      | 12.978 |
| A_23_P54736   | GNG13    | Homo sapiens guanine nucleotide binding protein (G protein), gamma 13 (GNG13), mRNA [NM_016541]                                        | 12.929 |
| A_33_P3278279 | TXNDC8   | Homo sapiens thioredoxin domain containing 8 (spermatzoa) (TXNDC8), transcript variant 3, mRNA [NM_001286947]                          | 12.755 |
| A_33_P3395581 | TRIM53AP | Homo sapiens tripartite motif containing 53A, pseudogene (TRIM53AP), non-coding RNA [NR_028346]                                        | 12.684 |
| A_24_P16353   | TRIM53AP | Homo sapiens tripartite motif containing 53A, pseudogene (TRIM53AP), non-coding RNA [NR_028346]                                        | 12.583 |
| A_23_P150467  | OR5I1    | Homo sapiens olfactory receptor, family 5, subfamily I, member 1 (OR5I1), mRNA [NM_006637]                                             | 12.507 |
| A_33_P3364488 | FCAMR    | Homo sapiens Fc receptor, IgA, IgM, high affinity (FCAMR), transcript variant 3, mRNA [NM_001170631]                                   | 12.445 |
| A_33_P3405479 | OR4C45   | Homo sapiens olfactory receptor, family 4, subfamily C, member 45 (OR4C45), mRNA [NM_001005513]                                        | 12.445 |
| A_24_P623782  | FRG2     | Homo sapiens FSHD region gene 2 (FRG2), transcript variant 2, mRNA [NM_001005217]                                                      | 12.288 |
| A_23_P76234   | RPH3A    | Homo sapiens rabphilin 3A homolog (mouse) (RPH3A), transcript variant 1, mRNA [NM_001143854]                                           | 12.194 |
| A_32_P720220  | C12orf36 | Homo sapiens chromosome 12 open reading frame 36 (C12orf36), long non-coding RNA [NR_036555]                                           | 12.117 |
| A_24_P400604  | RBM1B    | Homo sapiens RNA binding motif protein, Y-linked, family 1, member B (RBM1B), mRNA [NM_001006121]                                      | 12.099 |
| A_33_P3424507 | OR51F1   | Homo sapiens olfactory receptor, family 51, subfamily F, member 1 (OR51F1), mRNA [NM_001004752]                                        | 11.966 |
| A_33_P3358143 | C10orf71 | Homo sapiens chromosome 10 open reading frame 71 (C10orf71), mRNA [NM_001135196]                                                       | 11.840 |
| A_23_P81018   | PDHA2    | Homo sapiens pyruvate dehydrogenase (lipoamide) alpha 2 (PDHA2), mRNA [NM_005390]                                                      | 11.814 |
| A_23_P409502  | NLRP9    | Homo sapiens NLR family, pyrin domain containing 9 (NLRP9), mRNA [NM_176820]                                                           | 11.811 |
| A_23_P94647   | OR1L3    | Homo sapiens olfactory receptor, family 1, subfamily L, member 3 (OR1L3), mRNA [NM_001005234]                                          | 11.775 |
| A_33_P3319900 | PRG1     | Homo sapiens p53-responsive gene 1 (PRG1), long non-coding RNA [NR_026881]                                                             | 11.738 |
| A_23_P96291   | MAGEA1   | Homo sapiens melanoma antigen family A, 1 (directs expression of antigen MZ2-E) (MAGEA1), mRNA [NM_004988]                             | 11.698 |
| A_33_P3363071 | ITIH6    | Homo sapiens inter-alpha-trypsin inhibitor heavy chain family, member 6 (ITIH6), mRNA [NM_198510]                                      | 11.618 |
| A_23_P62099   | MAGEC2   | Homo sapiens melanoma antigen family C, 2 (MAGEC2), mRNA [NM_016249]                                                                   | 11.546 |
| A_33_P3317225 | OR2L5    | Homo sapiens olfactory receptor, family 2, subfamily L, member 5 (OR2L5), mRNA [NM_001258284]                                          | 11.510 |
| A_21_P0012072 | REG1P    | Homo sapiens regenerating islet-derived 1 pseudogene (REG1P), non-coding RNA [NR_002714]                                               | 11.507 |
| A_33_P3216570 | MUC5AC   | PREDICTED: Homo sapiens mucin 5AC, oligomeric mucus/gel-forming (MUC5AC), partial mRNA [XM_003119481]                                  | 11.473 |
| A_23_P15832   | OR1D5    | Homo sapiens olfactory receptor, family 1, subfamily D, member 5 (OR1D5), mRNA [NM_014566]                                             | 11.419 |
| A_33_P3239278 | OR4D10   | Homo sapiens olfactory receptor, family 4, subfamily D, member 10 (OR4D10), mRNA [NM_001004705]                                        | 11.413 |
| A_23_P409888  | FAM83C   | Homo sapiens family with sequence similarity 83, member C (FAM83C), mRNA [NM_178468]                                                   | 11.399 |
| A_24_P794458  | MOBP     | Homo sapiens myelin-associated oligodendrocyte basic protein (MOBP), transcript variant 3, mRNA [NM_182935]                            | 11.388 |

|               |          |                                                                                                                       |        |
|---------------|----------|-----------------------------------------------------------------------------------------------------------------------|--------|
| A_24_P70906   | PDILT    | Homo sapiens protein disulfide isomerase-like, testis expressed (PDILT), mRNA [NM_174924]                             | 11.383 |
| A_32_P196193  | PAQR9    | Homo sapiens progesterin and adipoQ receptor family member IX (PAQR9), mRNA [NM_198504]                               | 11.343 |
| A_33_P3326075 | CYP2C19  | Homo sapiens cytochrome P450, family 2, subfamily C, polypeptide 19 (CYP2C19), mRNA [NM_000769]                       | 11.256 |
| A_21_P0012346 | FAM230C  | family with sequence similarity 230, member C [Source:HGNC Symbol;Acc:24482] [ENST00000411581]                        | 11.142 |
| A_33_P3387781 | OR2L1P   | Homo sapiens olfactory receptor, family 2, subfamily L, member 1 pseudogene (OR2L1P), non-coding RNA [NR_002145]      | 11.126 |
| A_23_P65189   | PDX1     | Homo sapiens pancreatic and duodenal homeobox 1 (PDX1), mRNA [NM_000209]                                              | 11.056 |
| A_24_P298716  | FAM197Y2 | Homo sapiens family with sequence similarity 197, Y-linked, member 2 (FAM197Y2), non-coding RNA [NR_001553]           | 11.055 |
| A_33_P3300312 | DMBT1    | Homo sapiens deleted in malignant brain tumors 1 (DMBT1), transcript variant 2, mRNA [NM_007329]                      | 11.018 |
| A_23_P411157  | WNT1     | Homo sapiens wingless-type MMTV integration site family, member 1 (WNT1), mRNA [NM_005430]                            | 11.008 |
| A_23_P28023   | OR7A17   | Homo sapiens olfactory receptor, family 7, subfamily A, member 17 (OR7A17), mRNA [NM_030901]                          | 10.994 |
| A_23_P321892  | HRG      | Homo sapiens histidine-rich glycoprotein (HRG), mRNA [NM_000412]                                                      | 10.983 |
| A_33_P3258206 | OR6N2    | Homo sapiens olfactory receptor, family 6, subfamily N, member 2 (OR6N2), mRNA [NM_001005278]                         | 10.952 |
| A_33_P3342153 | USP17L8  | Homo sapiens ubiquitin specific peptidase 17-like family member 8 (USP17L8), mRNA [NM_001256872]                      | 10.950 |
| A_23_P84000   | CACNG2   | Homo sapiens calcium channel, voltage-dependent, gamma subunit 2 (CACNG2), mRNA [NM_006078]                           | 10.884 |
| A_33_P3391439 | MOBP     | Homo sapiens myelin-associated oligodendrocyte basic protein (MOBP), transcript variant 6, non-coding RNA [NR_103505] | 10.858 |
| A_21_P0001324 | MGC27382 | Homo sapiens cDNA FLJ34438 fis, clone HLUNG2001144. [AK091757]                                                        | 10.853 |
| A_24_P30557   | TBX5     | Homo sapiens T-box 5 (TBX5), transcript variant 1, mRNA [NM_000192]                                                   | 10.808 |
| A_32_P129120  | FAM182A  | Homo sapiens family with sequence similarity 182, member A (FAM182A), long non-coding RNA [NR_026713]                 | 10.792 |
| A_33_P3270360 | OR1S1    | Homo sapiens olfactory receptor, family 1, subfamily S, member 1 (OR1S1), mRNA [NM_001004458]                         | 10.741 |
| A_33_P3290577 | MS4A14   | Homo sapiens membrane-spanning 4-domains, subfamily A, member 14 (MS4A14), transcript variant 4, mRNA [NM_001261828]  | 10.725 |
| A_33_P3525377 | FLJ41130 | Homo sapiens cDNA FLJ41130 fis, clone BRACE2022549. [AK123125]                                                        | 10.676 |
| A_23_P93169   | LGSN     | Homo sapiens lengsin, lens protein with glutamine synthetase domain (LGSN), transcript variant 1, mRNA [NM_016571]    | 10.663 |
| A_23_P97826   | TECTB    | Homo sapiens tectorin beta (TECTB), mRNA [NM_058222]                                                                  | 10.650 |
| A_33_P3213288 | AIF1     | Homo sapiens allograft inflammatory factor 1 (AIF1), transcript variant 2, mRNA [NM_004847]                           | 10.645 |
| A_24_P325146  | KRTAP4-8 | Homo sapiens keratin associated protein 4-8 (KRTAP4-8), mRNA [NM_031960]                                              | 10.621 |
| A_23_P350396  | CDSN     | Homo sapiens corneodesmosin (CDSN), mRNA [NM_001264]                                                                  | 10.614 |
| A_23_P102694  | DEFB129  | Homo sapiens defensin, beta 129 (DEFB129), mRNA [NM_080831]                                                           | 10.475 |
| A_23_P353667  | MIR7-3HG | Homo sapiens MIR7-3 host gene (non-protein coding) (MIR7-3HG), long non-coding RNA [NR_027148]                        | 10.464 |
| A_24_P387875  | KCNJ10   | Homo sapiens potassium inwardly-rectifying channel, subfamily J, member 10 (KCNJ10), mRNA [NM_002241]                 | 10.456 |
| A_32_P88262   | SLC7A14  | Homo sapiens solute carrier family 7, member 14 (SLC7A14), mRNA [NM_020949]                                           | 10.455 |
| A_33_P3286846 | TP53TG3C | Homo sapiens TP53 target 3C (TP53TG3C), transcript variant 1, mRNA [NM_001205259]                                     | 10.446 |
| A_33_P3209406 | RTBDN    | Homo sapiens retbindin (RTBDN), transcript variant 3, mRNA [NM_001270440]                                             | 10.437 |

|               |            |                                                                                                                   |        |
|---------------|------------|-------------------------------------------------------------------------------------------------------------------|--------|
| A_32_P219660  | SPANXA1    | Homo sapiens sperm protein associated with the nucleus, X-linked, family member A1 (SPANXA1), mRNA [NM_013453]    | 10.419 |
| A_24_P342484  | CRP        | Homo sapiens C-reactive protein, pentraxin-related (CRP), mRNA [NM_000567]                                        | 10.414 |
| A_23_P376124  | RNASE8     | Homo sapiens ribonuclease, RNase A family, 8 (RNASE8), mRNA [NM_138331]                                           | 10.399 |
| A_23_P380526  | DPPA4      | Homo sapiens developmental pluripotency associated 4 (DPPA4), mRNA [NM_018189]                                    | 10.387 |
| A_23_P1691    | MMP1       | Homo sapiens matrix metalloproteinase 1 (interstitial collagenase) (MMP1), transcript variant 1, mRNA [NM_002421] | 10.378 |
| A_21_P0000439 | SNORD115-3 | Homo sapiens small nucleolar RNA, C/D box 115-3 (SNORD115-3), small nucleolar RNA [NR_003295]                     | 10.372 |
| A_21_P0012347 | FAM230C    | family with sequence similarity 230, member C [Source:HGNC Symbol;Acc:24482] [ENST00000411581]                    | 10.366 |

**Supplementary Table 2.** Top 100 downregulated genes in papillary tissue of both Randall's Plaque and normal mucosa with calcium oxalate stone formers compared to those with control patients.

| Agilent ID    | Gene Symbol | Description                                                                                          | Fold change |
|---------------|-------------|------------------------------------------------------------------------------------------------------|-------------|
| A_23_P58082   | CCDC80      | Homo sapiens coiled-coil domain containing 80 (CCDC80), transcript variant 1, mRNA [NM_199511]       | -13.184     |
| A_23_P150053  | ACTA2       | Homo sapiens actin, alpha 2, smooth muscle, aorta (ACTA2), transcript variant 2, mRNA [NM_001613]    | -12.840     |
| A_24_P277934  | COL1A2      | Homo sapiens collagen, type I, alpha 2 (COL1A2), mRNA [NM_000089]                                    | -12.467     |
| A_23_P216361  | COL14A1     | Homo sapiens collagen, type XIV, alpha 1 (COL14A1), mRNA [NM_021110]                                 | -12.049     |
| A_33_P3281191 | NID1        | Homo sapiens nidogen 1 (NID1), mRNA [NM_002508]                                                      | -11.939     |
| A_23_P33196   | COL5A2      | Homo sapiens collagen, type V, alpha 2 (COL5A2), mRNA [NM_000393]                                    | -11.736     |
| A_23_P350001  | GUCY1A2     | Homo sapiens guanylate cyclase 1, soluble, alpha 2 (GUCY1A2), transcript variant 2, mRNA [NM_000855] | -11.347     |
| A_33_P3382924 | SPARC       | Homo sapiens secreted protein, acidic, cysteine-rich (osteonectin) (SPARC), mRNA [NM_003118]         | -11.297     |
| A_33_P3238166 | PXDN        | Homo sapiens peroxidasin homolog (Drosophila) (PXDN), mRNA [NM_012293]                               | -11.209     |
| A_24_P935491  | COL3A1      | Homo sapiens collagen, type III, alpha 1 (COL3A1), mRNA [NM_000090]                                  | -11.107     |
| A_23_P143817  | MYLK        | Homo sapiens myosin light chain kinase (MYLK), transcript variant 1, mRNA [NM_053025]                | -11.035     |
| A_24_P921366  | CALD1       | Homo sapiens caldesmon 1 (CALD1), transcript variant 1, mRNA [NM_033138]                             | -10.885     |
| A_33_P3210488 | COL6A3      | Homo sapiens collagen, type VI, alpha 3 (COL6A3), transcript variant 1, mRNA [NM_004369]             | -10.735     |
| A_23_P152305  | CDH11       | Homo sapiens cadherin 11, type 2, OB-cadherin (osteoblast) (CDH11), mRNA [NM_001797]                 | -10.719     |
| A_23_P99063   | LUM         | Homo sapiens lumican (LUM), mRNA [NM_002345]                                                         | -10.322     |
| A_23_P31064   | MOXD1       | Homo sapiens monooxygenase, DBH-like 1 (MOXD1), transcript variant 2, mRNA [NM_015529]               | -10.303     |
| A_33_P3304668 | COL1A1      | Homo sapiens collagen, type I, alpha 1 (COL1A1), mRNA [NM_000088]                                    | -10.261     |
| A_24_P168925  | CHRDL1      | Homo sapiens chordin-like 1 (CHRDL1), transcript variant 1, mRNA [NM_001143981]                      | -10.190     |
| A_33_P3382856 | DCN         | Homo sapiens decorin (DCN), transcript variant E, mRNA [NM_133507]                                   | -10.138     |
| A_23_P21618   | PDZRN3      | Homo sapiens PDZ domain containing ring finger 3 (PDZRN3), mRNA [NM_015009]                          | -9.845      |
| A_24_P373152  | CFL2        | Homo sapiens cofilin 2 (muscle) (CFL2), transcript variant 1, mRNA [NM_021914]                       | -9.827      |
| A_23_P151805  | FBLN5       | Homo sapiens fibulin 5 (FBLN5), mRNA [NM_006329]                                                     | -9.626      |
| A_23_P2492    | C1S         | Homo sapiens complement component 1, s subcomponent (C1S), transcript variant 2, mRNA [NM_001734]    | -9.518      |
| A_23_P88069   | LHFP        | Homo sapiens lipoma HMGIC fusion partner (LHFP), mRNA [NM_005780]                                    | -9.487      |
| A_23_P415791  | KIAA1210    | Homo sapiens KIAA1210 (KIAA1210), mRNA [NM_020721]                                                   | -9.485      |
| A_23_P214168  | COL12A1     | Homo sapiens collagen, type XII, alpha 1 (COL12A1), transcript variant long, mRNA [NM_004370]        | -9.454      |
| A_33_P3271455 | PXDN        | Homo sapiens peroxidasin homolog (Drosophila) (PXDN), mRNA [NM_012293]                               | -9.297      |
| A_32_P80850   | COL14A1     | Homo sapiens collagen, type XIV, alpha 1 (COL14A1), mRNA [NM_021110]                                 | -9.180      |

|                |          |                                                                                                                            |        |
|----------------|----------|----------------------------------------------------------------------------------------------------------------------------|--------|
| A_23_P132956   | UCHL1    | Homo sapiens ubiquitin carboxyl-terminal esterase L1 (ubiquitin thiolesterase) (UCHL1), mRNA [NM_004181]                   | -9.083 |
| A_33_P3351416  | SMOC2    | Homo sapiens SPARC related modular calcium binding 2 (SMOC2), transcript variant 1, mRNA [NM_022138]                       | -9.041 |
| A_21_P0004312  | MIR143HG | Homo sapiens MIR143 host gene (non-protein coding) (MIR143HG), long non-coding RNA [NR_027180]                             | -9.036 |
| A_23_P64873    | DCN      | Homo sapiens decorin (DCN), transcript variant A1, mRNA [NM_001920]                                                        | -8.994 |
| A_21_P0000096  | CPXM1    | Homo sapiens carboxypeptidase X (M14 family), member 1 (CPXM1), transcript variant 1, mRNA [NM_019609]                     | -8.896 |
| A_32_P32254    | COL6A1   | Homo sapiens collagen, type VI, alpha 1 (COL6A1), mRNA [NM_001848]                                                         | -8.858 |
| A_23_P88404    | TGFB3    | Homo sapiens transforming growth factor, beta 3 (TGFB3), mRNA [NM_003239]                                                  | -8.841 |
| A_33_P3373358  | GJC1     | Homo sapiens gap junction protein, gamma 1, 45kDa (GJC1), transcript variant 1, mRNA [NM_005497]                           | -8.834 |
| A_23_P85015    | MAOB     | Homo sapiens monoamine oxidase B (MAOB), mRNA [NM_000898]                                                                  | -8.795 |
| A_23_P50786    | CLIP3    | Homo sapiens CAP-GLY domain containing linker protein 3 (CLIP3), transcript variant 2, mRNA [NM_015526]                    | -8.544 |
| A_24_P136866   | SLC8A1   | Homo sapiens solute carrier family 8 (sodium/calcium exchanger), member 1 (SLC8A1), transcript variant A, mRNA [NM_021097] | -8.541 |
| A_32_P192376   | ENPP1    | Homo sapiens ectonucleotide pyrophosphatase/phosphodiesterase 1 (ENPP1), mRNA [NM_006208]                                  | -8.457 |
| A_33_P3348239  | FBN1     | Homo sapiens fibrillin 1 (FBN1), mRNA [NM_000138]                                                                          | -8.441 |
| A_23_P101093   | COPZ2    | Homo sapiens coatomer protein complex, subunit zeta 2 (COPZ2), mRNA [NM_016429]                                            | -8.434 |
| A_24_P334130   | FN1      | Homo sapiens fibronectin 1 (FN1), transcript variant 7, mRNA [NM_054034]                                                   | -8.398 |
| A_23_P58251    | CPZ      | Homo sapiens carboxypeptidase Z (CPZ), transcript variant 3, mRNA [NM_001014448]                                           | -8.391 |
| A_23_P34744    | CTSK     | Homo sapiens cathepsin K (CTSK), mRNA [NM_000396]                                                                          | -8.355 |
| A_23_P205031   | COL4A2   | Homo sapiens collagen, type IV, alpha 2 (COL4A2), mRNA [NM_001846]                                                         | -8.336 |
| A_24_P12626    | CAV1     | Homo sapiens caveolin 1, caveolae protein, 22kDa (CAV1), transcript variant 1, mRNA [NM_001753]                            | -8.321 |
| A_33_P3212257  | MMRN1    | Homo sapiens multimerin 1 (MMRN1), mRNA [NM_007351]                                                                        | -8.315 |
| A_23_P67661    | COX7A1   | Homo sapiens cytochrome c oxidase subunit VIIa polypeptide 1 (muscle) (COX7A1), mRNA [NM_001864]                           | -8.296 |
| A_32_P152437   | AKAP12   | Homo sapiens A kinase (PRKA) anchor protein 12 (AKAP12), transcript variant 1, mRNA [NM_005100]                            | -8.245 |
| A_32_P133072   | SPON1    | Homo sapiens spondin 1, extracellular matrix protein (SPON1), mRNA [NM_006108]                                             | -8.229 |
| A_23_P157299   | AEBP1    | Homo sapiens AE binding protein 1 (AEBP1), mRNA [NM_001129]                                                                | -8.214 |
| A_23_P157865   | TNC      | Homo sapiens tenascin C (TNC), mRNA [NM_002160]                                                                            | -8.136 |
| A_19_P00324470 | MIR143HG | Homo sapiens MIR143 host gene (non-protein coding) (MIR143HG), long non-coding RNA [NR_027180]                             | -8.096 |
| A_23_P83028    | RECK     | Homo sapiens reversion-inducing-cysteine-rich protein with kazal motifs (RECK), mRNA [NM_021111]                           | -8.088 |
| A_33_P3254096  | PI15     | Homo sapiens peptidase inhibitor 15 (PI15), mRNA [NM_015886]                                                               | -8.032 |
| A_33_P3278313  | MSRB3    | Homo sapiens methionine sulfoxide reductase B3 (MSRB3), transcript variant 3, mRNA [NM_001193460]                          | -7.980 |
| A_23_P157914   | MAMDC2   | Homo sapiens MAM domain containing 2 (MAMDC2), mRNA [NM_153267]                                                            | -7.957 |
| A_33_P3269539  | COL6A2   | Homo sapiens collagen, type VI, alpha 2 (COL6A2), transcript variant 2C2a, mRNA [NM_058174]                                | -7.950 |
| A_23_P50426    | KANK2    | Homo sapiens KN motif and ankyrin repeat domains 2 (KANK2), transcript variant 1, mRNA [NM_015493]                         | -7.930 |
| A_23_P64879    | KCNJ8    | Homo sapiens potassium inwardly-rectifying channel, subfamily J, member 8 (KCNJ8), mRNA [NM_004982]                        | -7.928 |

|               |          |                                                                                                                                 |        |
|---------------|----------|---------------------------------------------------------------------------------------------------------------------------------|--------|
| A_23_P41476   | SHISA3   | Homo sapiens shisa family member 3 (SHISA3), mRNA [NM_001080505]                                                                | -7.910 |
| A_24_P354689  | SPOCK1   | Homo sapiens sparc/osteonectin, cwcv and kazal-like domains proteoglycan (testican) 1 (SPOCK1), mRNA [NM_004598]                | -7.857 |
| A_33_P3382177 | TIMP2    | Homo sapiens TIMP metalloproteinase inhibitor 2 (TIMP2), mRNA [NM_003255]                                                       | -7.781 |
| A_21_P0003931 | MIR143HG | Homo sapiens MIR143 host gene (non-protein coding) (MIR143HG), long non-coding RNA [NR_027180]                                  | -7.717 |
| A_23_P361014  | TSHZ3    | Homo sapiens teashirt zinc finger homeobox 3 (TSHZ3), mRNA [NM_020856]                                                          | -7.717 |
| A_33_P3229617 | SGCE     | Homo sapiens sarcoglycan, epsilon (SGCE), transcript variant 1, mRNA [NM_001099401]                                             | -7.663 |
| A_23_P213857  | C7       | Homo sapiens complement component 7 (C7), mRNA [NM_000587]                                                                      | -7.650 |
| A_23_P216596  | SVEP1    | Homo sapiens sushi, von Willebrand factor type A, EGF and pentraxin domain containing 1 (SVEP1), mRNA [NM_153366]               | -7.649 |
| A_24_P879740  | MAP1B    | Homo sapiens microtubule-associated protein 1B (MAP1B), mRNA [NM_005909]                                                        | -7.603 |
| A_33_P3363799 | NCAM1    | Homo sapiens neural cell adhesion molecule 1 (NCAM1), transcript variant 5, mRNA [NM_001242607]                                 | -7.556 |
| A_23_P356554  | BAG2     | Homo sapiens BCL2-associated athanogene 2 (BAG2), mRNA [NM_004282]                                                              | -7.543 |
| A_23_P144959  | VCAN     | Homo sapiens versican (VCAN), transcript variant 1, mRNA [NM_004385]                                                            | -7.522 |
| A_23_P100711  | PMP22    | Homo sapiens peripheral myelin protein 22 (PMP22), transcript variant 1, mRNA [NM_000304]                                       | -7.508 |
| A_33_P3321432 | FAM198B  | Homo sapiens family with sequence similarity 198, member B (FAM198B), transcript variant 2, mRNA [NM_016613]                    | -7.467 |
| A_23_P82990   | OGN      | Homo sapiens osteoglycin (OGN), transcript variant 1, mRNA [NM_033014]                                                          | -7.426 |
| A_33_P3230478 | C1S      | Homo sapiens complement component 1, s subcomponent (C1S), transcript variant 1, mRNA [NM_201442]                               | -7.389 |
| A_23_P210425  | MYL9     | Homo sapiens myosin, light chain 9, regulatory (MYL9), transcript variant 2, mRNA [NM_181526]                                   | -7.367 |
| A_33_P3344477 | FERMT2   | Homo sapiens fermitin family member 2 (FERMT2), transcript variant 2, mRNA [NM_001134999]                                       | -7.341 |
| A_23_P257649  | RBP1     | Homo sapiens retinol binding protein 1, cellular (RBP1), transcript variant 1, mRNA [NM_002899]                                 | -7.333 |
| A_24_P261417  | DKK3     | Homo sapiens dickkopf WNT signaling pathway inhibitor 3 (DKK3), transcript variant 1, mRNA [NM_015881]                          | -7.298 |
| A_23_P113351  | SPARCL1  | Homo sapiens SPARC-like 1 (hevin) (SPARCL1), transcript variant 2, mRNA [NM_004684]                                             | -7.279 |
| A_23_P432573  | MRGPRF   | Homo sapiens MAS-related GPR, member F (MRGPRF), transcript variant 2, mRNA [NM_145015]                                         | -7.246 |
| A_24_P131522  | ANTXR1   | Homo sapiens anthrax toxin receptor 1 (ANTXR1), transcript variant 1, mRNA [NM_032208]                                          | -7.239 |
| A_24_P55496   | OSR2     | Homo sapiens odd-skipped related transcription factor 2 (OSR2), transcript variant 2, mRNA [NM_053001]                          | -7.235 |
| A_33_P3231953 | COL12A1  | Homo sapiens collagen, type XII, alpha 1 (COL12A1), transcript variant long, mRNA [NM_004370]                                   | -7.216 |
| A_23_P97990   | HTRA1    | Homo sapiens HtrA serine peptidase 1 (HTRA1), mRNA [NM_002775]                                                                  | -7.184 |
| A_23_P98645   | DCHS1    | Homo sapiens dachshous cadherin-related 1 (DCHS1), mRNA [NM_003737]                                                             | -7.147 |
| A_24_P925062  | MXRA7    | Homo sapiens matrix-remodelling associated 7 (MXRA7), transcript variant 1, mRNA [NM_001008528]                                 | -7.105 |
| A_23_P303671  | ECM2     | Homo sapiens extracellular matrix protein 2, female organ and adipocyte specific (ECM2), transcript variant 1, mRNA [NM_001393] | -7.092 |
| A_33_P3364741 | MRC2     | Homo sapiens mannose receptor, C type 2 (MRC2), mRNA [NM_006039]                                                                | -7.072 |
| A_23_P369899  | TMEM158  | Homo sapiens transmembrane protein 158 (gene/pseudogene) (TMEM158), mRNA [NM_015444]                                            | -7.038 |



|                |        |                                                                                                                                    |        |
|----------------|--------|------------------------------------------------------------------------------------------------------------------------------------|--------|
| A_24_P937405   | PRSS23 | Homo sapiens protease, serine, 23 (PRSS23), mRNA [NM_007173]                                                                       | -7.002 |
| A_19_P00807411 | RNF180 | Homo sapiens ring finger protein 180 (RNF180), transcript variant 1, mRNA [NM_001113561]                                           | -6.993 |
| A_32_P36694    | JAZF1  | Homo sapiens JAZF zinc finger 1 (JAZF1), mRNA [NM_175061]                                                                          | -6.980 |
| A_33_P3270599  | TPM2   | Homo sapiens tropomyosin 2 (beta) (TPM2), transcript variant 2, mRNA [NM_213674]                                                   | -6.974 |
| A_19_P00324839 | MALAT1 | Homo sapiens metastasis associated lung adenocarcinoma transcript 1 (non-protein coding) (MALAT1), long non-coding RNA [NR_002819] | -6.965 |
| A_33_P3236102  | IER5L  | Homo sapiens immediate early response 5-like (IER5L), mRNA [NM_203434]                                                             | -6.866 |
| A_33_P3366120  | FLNA   | Homo sapiens filamin A, alpha (FLNA), transcript variant 2, mRNA [NM_001110556]                                                    | -6.822 |

**Supplementary Table 3.** Top 15 networks in both Randall's Plaque and normal papillary tissue gene expressions are differed from control mucosa by 2 folds

| Network ID | Molecules in Network                                                                                                                                                                                                                                                             | Score | Focus Molecules | Top Diseases and Functions                                                                                                     |
|------------|----------------------------------------------------------------------------------------------------------------------------------------------------------------------------------------------------------------------------------------------------------------------------------|-------|-----------------|--------------------------------------------------------------------------------------------------------------------------------|
| 1          | ABO,ATP10A,C11orf54,CDHR1,CRY1,CSTF2T,DNAAF3,DPF3,DPM2,DTWD1,FAM53C,FNDC3B,FOXRED1,GOLIM4,HAAO,HHLA2,HIST1H2BG,HNF4A,KDEL1,LINC00574,LINC01558,PRODH2,REG1A,RNF113A,SGCB,SGCE,SPATA5L1,STXBP5L,TCEAL3,TMEM79,TMEM242,TMIGD1,TTC22,VAC14,ZNHIT6                                   | 41    | 35              | Developmental Disorder, Hereditary Disorder, Respiratory Disease                                                               |
| 2          | ABCC9,C1QTNF6,CDC42SE2,CENPM,CENPN,CFL2,DCBLD2,DDX54,DNAH2,DNAH3,DNAH8,DNAH9,DNAH10,DNAH12,DNAH17,DNAI1,EML1,ESR1,GAL,GULP1,Kcnj,KCNJ8,KCTD6,KLHL24,NPW,ONECUT2,PCDHB5,PCDHB17P,PGC,PRDM2,RBM23,RTN4RL1,TMEM72,UMODL1,VEZF1                                                      | 38    | 34              | Cardiac Arteriopathy, Cardiovascular Disease, Organismal Injury and Abnormalities                                              |
| 3          | ADGRA1,ADGRG4,ADGRG5,ADGRG7,Gpcr,GPR12,GPR35,GPR55,GPR61,GPR62,GPR88,GPR101,GPR139,GPR148,GPR155,GPR157,GPR182,GPR137C,HTR6,HTR5A,MC3R,MC5R,MCHR1,NMBR,NPBWR2,NTSR1,NTSR2,OPRL1,RGR,RRH,RXFP2,SLC52A1,TAAR5,TAAR8,XCR1                                                           | 38    | 34              | Cell-To-Cell Signaling and Interaction, Cell Signaling, Nucleic Acid Metabolism                                                |
| 4          | BNIP3,CCDC57,CCDC155,CD302,CDC20B,FAM90A1,FATE1,FRA10AC1,Gsk3,H2AFB3 (includes others),KRTAP10-1,KRTAP10-5,KRTAP2-3/KRTAP2-4,KRTAP3-2,KRTAP4-2,LCE3E,LCE4A,LDLRAD1,LNPEP,MOBP,OTX1,PAQR9,PLAGL2,PRM2,S6K1,SPATA8,STRIP2,SUN3,TMCC2,TMEM190,TRAF3IP3,TRIM36,TSGA10IP,TSHZ3,ZFC3H1 | 36    | 33              | Cardiovascular System Development and Function, Auditory and Vestibular System Development and Function, Embryonic Development |
| 5          | ABI2,ACTN2,ADAM29,APBA1,Caspase 3/7,CFAP61,CTAGE1,DDN,DENND2A,DLG4,DLGAP2,DLGAP3,ENPP1,FAM81A,GAS2L2,GRM5,HUNK,KCNJ5,KCNJ6,KCNJ10,MAGI1,MARCH10,NEFL,NLGN1,NMDA Receptor,PRAMEF4 (includes others),ROBO2,RTKN2,SDK2,SLIT1,SNX22,SPATA16,SYNPO2L,ZDHHC8,ZIC5                      | 36    | 33              | Cancer, Connective Tissue Disorders, Dermatological Diseases and Conditions                                                    |
| 6          | alpha2-adrenergic receptor,ALX4,B4GAT1,DLX1,ELAVL2,Focal adhesion kinase,GUCY,GUCY1A2,HOXC13,HOXD12,IRX4,LHX2,LHX9,LMX1B,LPP,NEUROD1,NHLH1,NR2E1,NR2E3,OLFM1,OR8B8,OSR2,PALLD,PAX9,POLK,POU4F1,POU4F2,PRRX1,RCVRN,RUNDC3A,SHPRH,SSBP3,SSX4/SSX4B,TBL3,ZFH4                       | 34    | 32              | Embryonic Development, Organismal Development, Gene Expression                                                                 |
| 7          | AHSG,ASIC2,ATP13A4,AZGP1,BOLL,BPIFA1,BRIP1,C1orf94,CD177,COL1A2,COL6A1,DMRT1,ENaC,ERCC2,FGF18,GJA3,HIST1H2BC,HNRNPLL,IFN alpha receptor,KLK14,NR2F2,P4HA1,P4HA2,p85 (pik3r),PPP3R1,PSG1,QKI,RBMY1A1 (includes others),RFX2,SEMG2,SHBG,STRA8,TFIIH,UVSSA,ZNF385C                  | 32    | 31              | Amino Acid Metabolism, Post-Translational Modification, Small Molecule Biochemistry                                            |
| 8          | AKR1D1,ALPP,CDYL2,CHURC1,CRABP2,FBXL7,FHL1,FLRT2,GF11,H3F3A/H3F3B,HOXA10,HSD3B1,KDEL2,KDM4B,KLK12,KMT2D,LZYL1,MMRN1,MYOM3,N4BP2L2,NAA38,NDUFS7,Neurotrophin,NFIL3,NKTR,PAX7,PTGR1,RELL1,Shc,SLC38A6,Sos,TFAP2D,TPP1,Trk Receptor,XKRX                                            | 32    | 31              | Organismal Injury and Abnormalities, Dermatological Diseases and Conditions, Cell-mediated Immune Response                     |
| 9          | ACKR3,Adaptor protein 2,Beta Arrestin,C1orf74,CALCR,CFC1/CFC1B,Clathrin,DAB2,DPPA2,DPPA4,EDNRA,ESPL1,F2RL2,Fgf,FGF13,FGF16,FOXJ3,FZD1,FZD2,HK3,KIFC1,KIT,LGALS1,MICAL1,MITF,MUC16,PAX3,PITX2,RAMP1,SLC19A1,SLC45A2,SPC24,SYT6,TBX4,TFAP2A                                        | 32    | 31              | Cardiovascular Disease, Congenital Heart Anomaly, Developmental Disorder                                                       |

|    |                                                                                                                                                                                                                                                                                                    |    |    |                                                                                                                     |
|----|----------------------------------------------------------------------------------------------------------------------------------------------------------------------------------------------------------------------------------------------------------------------------------------------------|----|----|---------------------------------------------------------------------------------------------------------------------|
| 10 | ABCC2,BCAN,chymotrypsin,Collagen type XVIII,CTRC,DKK3,EFEMP2,FBLN1,FBN1,FN1,FXR ligand-FXR-Retinoic acid-RXR $\alpha$ ,GYPA,GYPB,HAPLN4,HBE1,HBG1,HBQ1,HBZ,hemoglobin,HIST1H2BD,HIST1H4C,HIST1H4E,HIST1H4F,HIST1H4H,HIST1H4K,IL22RA1,KIF21B,KLF1,KMT2E,MDM4,SLC4A1,TMPRS S6,TRIM10,Trypsinogen,ZAK | 30 | 30 | Post-Translational Modification, Protein Synthesis, Cellular Development                                            |
| 11 | ANKRA2,ARNT,CARTPT,CCKBR,CPS1,Creb,CRHR2,DAPK3,DRD3,FFAR4,FSH,GHRHR,GIPR,GNPAT,GNRH,GPR119,HNF1A,HRH3,INS,KIAA1324,LEP,Lh,NDN,P2RY14,PDX1,Proinsulin,PTGER 3,QRFP,REG1B,REG1P,SLC2A2,SST,SSTR3,XKR4,ZNF331                                                                                         | 30 | 30 | Cell Signaling, Nucleic Acid Metabolism, Small Molecule Biochemistry                                                |
| 12 | ARRDC3,CAGE1,CCDC33,CHRDL1,CT55,Ctnna,CTNNA3,DYDC1,Filamin,FLNA,HAS1,HEXB,HOXD10,Integrin $\beta$ ,KLHL38,LGALS14,MAGEC2,MAOB,MBIP,NCS1,NREP,OR4D6,PAK1,PARP2,POLR1C,PRSS21,Rnr,Sapk,SAXO1,STARD6,TRIM42,TXLNB,UBIQUITIN LIGASE,USHBP1,ZFYVE26                                                     | 28 | 29 | Inflammatory Disease, Respiratory Disease, Hereditary Disorder                                                      |
| 13 | 26s Proteasome,ADAMTS17,ADARB2,AHNAK2,APCDD1,ASB10,CDKN1B,CNOT6L,DCLK3,DNAJC5B,DNAJC5G,GLI3,GPT2,GRPR,HISTONE,HSP,Hsp70,Hsp90,HSPA12A,HSPB9,KLK3,LOXL2,MGEA5,NAP1L1,NEAT1,ODF1,PRDM9,PUM1,SPATA2L,SSX3,SSX5,TSACC,TSSK6,Ubiquitin,ZSCAN1                                                           | 28 | 29 | Cell Cycle, Dermatological Diseases and Conditions, Developmental Disorder                                          |
| 14 | AKAP,AKAP4,AKAP12,AKAP14,CABYR,cldn,CLDN9,CLDN17,CTPS1,DCD,DCT,Dlg,EMX1,ESX1,FAM107A,FLVCR2,HOXB1,LHX5,MEIS1,MITF-p300/CBP,MPDZ,OR1D2,OR2AG2,OR5D16,OTX2,Pka,RAD51D,ROPN1,SLC39A12,SLC6A20,SOX2-OCT4-NANOG,sPla2,TPH1,TPH2,XKR3                                                                    | 26 | 28 | Nervous System Development and Function, Organ Morphology, Organismal Development                                   |
| 15 | Ampa Receptor,CABP1,CABP2,cacn,CACNA1S,Cacng,CACNG2,CACNG3,CACNG7,CALML5,Calmodulin,CaMKII,CNTN2,CPLX2,CPLX4,EEA1,GPHA2,N-type Calcium Channel,NEUROD2,PCP4,PHOSPHO1,RAB22A,RIMBP2,RIMS1,RPH3A,SCN2A,SEZ6,Snare,SRY,SYN3,SYT1,SYT3,TRPM3,TSHB,WNK4                                                 | 26 | 28 | Cell-To-Cell Signaling and Interaction, Nervous System Development and Function, Cellular Assembly and Organization |

**Supplementary Table 4.** All networks in Randall's Plaque tissue gene expression is differed from normal papillary tissue by 2 folds

| Network ID | Molecules in Network                                                                                                                                                                                                                                      | Score | Focus Molecules | Top Diseases and Functions                                                   |
|------------|-----------------------------------------------------------------------------------------------------------------------------------------------------------------------------------------------------------------------------------------------------------|-------|-----------------|------------------------------------------------------------------------------|
| 1          | ADAMTS12,Akt,C8orf4,CAPG,CCL20,CCL22,cyclooxygenase,ERK1/2,FAM3B,gelatinase,GHRH,IL1,IL11,IL17C,IRF6,Kcnj,KCNJ1,LCN2,MEOX2,MMD,MUC4,NALCN,NFAT5,PI3K (complex),Pka,POU3F3,Pro-inflammatory Cytokine,PROK1,PRTN3,PTGS1,S100a7a,SFTPb,SLC12A1,SLPI,Tgf beta | 25    | 10              | Inflammatory Response, Endocrine System Disorders, Hereditary Disorder       |
| 2          | ADAT2,ADRB2,ANLN,ATF5,CAPG,CCL17,CKAP2,CORO1C,DHRS9,DRD4,GABBR2,GDPD1,Girk,GPX3,KCNJ1,KCNJ5,KCNJ6,KCNJ10,KIF23,NAV2,OXSR1,PGRMC1,PPRC1,PRDM16,PTGFR,RBM15B,RGS9,SCGB1D2,SEPHS1,SREBF1,TAGLN2,TP53,TRIO,UBC,ZNF705G                                        | 19    | 8               | Molecular Transport, Cellular Development, Cellular Growth and Proliferation |

**Supplementary Table 5.** Upstream regulators for genes which showed over/lower 2 folds between Randall's Plaque and normal papillary tissue in CaOx stone formers.

| Upstream Regulator        | Molecule Type                     | Predicted Activation State | Activation z-score | p-value of overlap | Target molecules in dataset                      |
|---------------------------|-----------------------------------|----------------------------|--------------------|--------------------|--------------------------------------------------|
| IL1B                      | cytokine                          | Activated                  | 2.400              | 0.000028           | IL11,KCNJ1,LCN2,MUC4,PTGS1,SLC12A1               |
| lipopolysaccharide        | chemical drug                     | Activated                  | 2.360              | 0.000141           | AQP1,IL11,KCNJ1,LCN2,PTGS1,SLC12A1,SLPI          |
| TNF                       | cytokine                          | Activated                  | 2.214              | 0.000001           | AQP1,IL11,KCNJ1,LCN2,MMD,MUC4,PTGS1,SLC12A1,SLPI |
| phorbol myristate acetate | chemical drug                     | Activated                  | 2.169              | 0.000696           | IL11,LCN2,MUC4,PTGS1,SLPI                        |
| TGFB1                     | growth factor                     |                            | 1.972              | 0.006700           | AQP1,IL11,LCN2,MUC4,PTGS1                        |
| TGFA                      | growth factor                     |                            | 1.969              | 0.000001           | LCN2,MUC4,PTGS1,SLPI                             |
| IFNG                      | cytokine                          |                            | 1.424              | 0.000025           | AQP1,IL11,KCNJ1,LCN2,MUC4,SLC12A1,SLPI           |
| tretinoin                 | chemical - endogenous mammalian   |                            | 1.102              | 0.000490           | AQP1,DHRS9,MUC4,NAV2,PTGS1,SLPI                  |
| HOXA10                    | transcription regulator           |                            | 0.000              | 0.000010           | AQP1,DHRS9,IL11,LCN2                             |
| beta-estradiol            | chemical - endogenous mammalian   |                            | -0.302             | 0.000020           | AQP1,C8orf4,DHRS9,GPX3,LCN2,MMD,PTGS1,SLPI       |
| dexamethasone             | chemical drug                     |                            | -0.358             | 0.000011           | AQP1,C8orf4,IL11,KCNJ1,LCN2,PTGS1,SLC12A1,SLPI   |
| NR3C1                     | ligand-dependent nuclear receptor |                            | -1.000             | 0.001410           | AQP1,C8orf4,GPX3,IL11                            |

**Supplementary Table 6.** TaqMan primer information which were used for Quantitative Reverse Transcription polymerase chain reaction.

| Probe   | Gene Name                                                                  | TaqMan Assay ID |
|---------|----------------------------------------------------------------------------|-----------------|
| LCN2    | lipocalin 2                                                                | Hs01008571_m1   |
| IL11    | interleukin 11                                                             | Hs01055413_g1   |
| SLPI    | secretory leukocyte peptidase inhibitor                                    | Hs00268204_m1   |
| MUC4    | mucin 4, cell surface associated                                           | Hs00366414_m1   |
| PTGS1   | prostaglandin-endoperoxide synthase 1                                      | Hs00377726_m1   |
| GPX3    | glutathione peroxidase 3                                                   | Hs01078668_m1   |
| MMD     | monocyte to macrophage differentiation-associated                          | Hs00948031_m1   |
| C8orf4  | chromosome 8 open reading frame 4                                          | Hs00535539_s1   |
| SCGB1D2 | secretoglobin, family 1D, member 2                                         | Hs00255208_m1   |
| KCNJ1   | potassium channel, inwardly rectifying subfamily J, member 1               | Hs00165012_m1   |
| NAV2    | neuron navigator 2                                                         | Hs01093707_m1   |
| GDPD1   | glycerophosphodiester phosphodiesterase domain containing 1                | Hs00402246_m1   |
| SLC12A1 | solute carrier family 12 (sodium/potassium/chloride transporter), member 1 | Hs00165731_m1   |
| NALCN   | sodium leak channel, non selective                                         | Hs00291166_m1   |
| AQP1    | aquaporin 1                                                                | Hs01028916_m1   |
| IL1B    | interleukin 1 $\beta$                                                      | Hs00174097_m1   |
| IL6     | interleukin 6                                                              | Hs00985639_m1   |
| NOS2    | nitric oxide synthase 2                                                    | Hs01075529_m1   |
| TNF     | tumor necrosis factor                                                      | Hs01113624_g1   |
| GAPDH   | glyceraldehyde-3-phosphate dehydrogenase                                   | Hs02758991_g1   |

**Supplementary Table 7.** Primary antibodies for immunohistochemical stain.

| <b>Protein Name</b> | <b>Antibodies</b>                                                         | <b>Product Codes</b> |
|---------------------|---------------------------------------------------------------------------|----------------------|
| LCN2                | anti-human lipocalin-2 / NGAL rat monoclonal IgG (R&D Systems)            | MAB1757              |
| IL11                | anti-human interleukin 11 rabbit polyclonal IgG (Novus Biologicals)       | NBP1-19815           |
| SLPI                | anti-human SLPI mouse monoclonal IgG (abcam)                              | ab17157              |
| PTGS1               | anti-human COX1 / Cyclooxygenase 1 rabbit monoclonal IgG (abcam)          | ab109025             |
| GPX3                | anti-human Glutathione Peroxidase 3 rabbit polyclonal IgG (abcam)         | ab170313             |
| MMD                 | anti-human MMD (N-14) goat polyclonal IgG (Santa Cruz)                    | sc-243494            |
| SCGB1D2             | anti-human SCGB1D2 / Lipophilin B (T-14) goat polyclonal IgG (Santa Cruz) | sc-48327             |
| SLC12A1             | anti-human SLC12A1 rabbit polyclonal IgG (abcam)                          | ab60301              |
| NALCN               | anti-human NALCN (N-20) rabbit polyclonal IgG (Santa Cruz)                | sc-84520             |
| CD68                | anti-human CD68 (KP1) mouse monoclonal IgG (Dako)                         | M0814                |
| CD138               | anti-human CD138 (MI15) mouse monoclonal IgG (Dako)                       | M7228                |
| Neutrophil Elastase | anti-human Neutrophil Elastase (NP57) mouse monoclonal IgG (Dako)         | M0752                |
| uroplakin III       | anti-human uroplakin III (SFI-1) mouse monoclonal IgG (abcam)             | ab78196              |
| KSP                 | anti-human KSP (aa1-30) rabbit polyclonal IgG (LSBio)                     | LS-C164201           |
| vimentin            | anti-human vimentin (V9) mouse monoclonal IgG (Dako)                      | M0725                |
